# Supplementary material for: Seropositivity of Anti-Toxoplasma gondii Antibodies in Owners and Their Dogs Living on Island and Mainland Seashore Areas of Southern Brazil
Source: MDPI journal article supplement (doi:10.3390/tropicalmed7100252), 2022-09-20
Supplement: s1 [file s1]

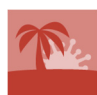

Article

# Seropositivity of Anti-*Toxoplasma gondii* Antibodies in Owners and Their Dogs Living on Island and Mainland Seashore Areas of Southern Brazil

Aaronson Ramathan Freitas <sup>1</sup>, Ruana Renostro Delai <sup>1</sup>, Louise Bach Kmetiuk <sup>2</sup>, Evelyn Cristine da Silva <sup>3</sup>, Rafaella Martini <sup>1</sup>, Ana Pérola Drulla Brandão <sup>4</sup>, Rogério Giuffrida <sup>5</sup>, Ivan Roque de Barros-Filho <sup>1</sup>, Rodrigo Costa da Silva <sup>5</sup>, Hélio Langoni <sup>3</sup>, Fabiano Borges Figueiredo <sup>2</sup>, Cláudia Turra Pimpão <sup>6</sup>, Andrea Pires Dos Santos <sup>7</sup>, Vamilton Alvares Santarém <sup>5</sup> and Alexander Welker Biondo <sup>1,7,\*</sup>

<sup>1</sup> Department of Veterinary Medicine, Federal University of Paraná State, Curitiba 80035-050, PR, Brazil

<sup>2</sup> Laboratory of Cell Biology, Carlos Chagas Institute, Oswaldo Cruz Foundation, Curitiba 81310-020, PR, Brazil

<sup>3</sup> Department of Veterinary Hygiene and Public Health, São Paulo State University, Botucatu 18618-681, SP, Brazil

<sup>4</sup> Department of Preventive Medicine, University of São Paulo São Paulo 05508-270, SP, Brazil

<sup>5</sup> Laboratory of Veterinary Parasitology, Veterinary Teaching Hospital, University of Western São Paulo, São Paulo 190019-70, SP, Brazil

<sup>6</sup> Department of Animal Science, School of Life Sciences, Pontifical Catholic University of Paraná, Curitiba 80230-130, PR, Brazil

<sup>7</sup> Department of Comparative Pathobiology, College of Veterinary Medicine, Purdue University, West Lafayette, IN, 47907, USA

\* Correspondence: abiondo@ufpr.br; Tel.: +55-41-3350-5623

## Supplementary Materials

**Table S1.** Univariate analysis for accessing bred, age and hunting behavior as risk factor for anti-*Toxoplasma gondii* antibodies detected by IFAT test in dogs from island and seashore mainland areas of southern Brazil (N = 283).

| Variable *           | anti- <i>T. gondii</i> antibodies |                  | Univariate Analysis |         |
|----------------------|-----------------------------------|------------------|---------------------|---------|
|                      |                                   |                  | OR (95% CI)         | p-value |
|                      | Seropositive (%)                  | Seronegative (%) |                     |         |
|                      | 66/283 (23.3)                     | 217/283 (76.7)   |                     |         |
| Bred                 |                                   |                  |                     | 0.087   |
| Purebred             | 13 (20.0)                         | 67 (32.1)        | Ref.                |         |
| Mixed breed          | 52 (80.0)                         | 142 (67.9)       | 1.87 (0.97–3.81)    |         |
| Age                  |                                   |                  |                     | 0.005   |
| <1 year              | 1 (2.0)                           | 34 (18.7)        | Ref.                |         |
| 1 to 8 years         | 39 (79.6)                         | 132 (72.5)       | 8.79 (1.81–212)     |         |
| >8 years             | 9 (18.4)                          | 16 (8.9)         | 16.4 (2.68–433)     |         |
| Dog hunting behavior |                                   |                  |                     | 0.155   |
| No                   | 34 (57.6)                         | 132 (68.8)       | Ref.                |         |
| Yes                  | 25 (42.4)                         | 60 (31.2)        | 1.62 (0.88–2.95)    |         |

\* Missing data values for breed (9/283 = 3.2%), age (52/283 = 18.4%) and dog hunting behavior (32/283 = 11.3%). The variables were analyzed separately due to the number of missing (age and hunting behavior: lost of information higher than 10%) or imprecision of data regarding bred provided by dog's owners.
